# Supplementary material for: A prospective analysis of dietary policies in Iran: Applying the NOURISHING Framework to Identify Challenges and Policy Gaps
Source: Research Square preprint supplement (doi:10.21203/rs.3.rs-7062418/v1), 2025-07-23
Supplement: Supplementary file 1 [file 188e2e4af61b5f5ebc7a15c6.docx]

## Supplementary materials

| **No.** | **Title of Document** | **Year of Publication** |
| --- | --- | --- |
| 1 | Bill on Non-repayable Funds Allocated to the Nutrition Research Institute (Article 172, Direct Taxation Law) | 2001 |
| 2 | Bill for Covering Budget Deficit of the Free School Feeding Plan in Deprived Areas by the Organization for Consumer and Producer Support | 1989 |
| 3 | Bill on Setting a Financial Ceiling for Facilities for Supplying and Distributing Essential and Market-Regulated Goods | 1996 |
| 4 | Bill on Listing Agricultural and Agro-industrial Products (Article 141-A, Direct Taxation Law) and Tax Exemptions | 1999 |
| 5 | Bill on the List of Health-damaging Goods and Substances and High-risk Medications | 2022 |
| 6 | Bill on Allocating Budget for Nutrition in Deprived and Rural Areas of Sistan and Baluchestan | 1987 |
| 7 | Bill on Funding Flour for Free School Feeding Programs in Deprived Areas (Ministry of Education) | 1996 |
| 8 | Bill on Agricultural Products Pricing and Support Policy Council | 2021 |
| 9 | Bill to Support Producers and Distributors of Healthy and Safe Food (Based on Article 138 of the Constitution) | 2007 |
| 10 | Bill on Providing Food Rations (Rice, Sugar, Chicken, Vegetable Oil) to Low-income Families Based on Official Statistics | 1997 |
| 11 | Law on Provision of Essential Goods for Vulnerable Populations | 2013 |
| 12 | Performance Report of the Ministry of Agriculture Jihad (Ruhani Administration) | 2016 |
| 13 | National Document on Prevention and Control of Non-Communicable Diseases and Related Risk Factors (2015–2025) | 2015 |
| 14 | Final Report on the Development of the National Nutrition and Food Security Policy (2012–2015) | 2014 |
| 15 | General Policies on Reforming Consumption Patterns | 2010 |
| 16 | General Health Policies | 2014 |
| 17 | General Policies on the Resistance Economy | 2013 |
| 18 | General Environmental Policies | 2015 |
| 19 | First National Development Plan of the Islamic Republic of Iran | 1991–1996 |
| 20 | Second National Development Plan | 1997–2001 |
| 21 | Third National Development Plan | 2002–2006 |
| 22 | Fourth National Development Plan | 2007–2011 |
| 23 | Fifth National Development Plan | 2012–2016 |
| 24 | Sixth National Development Plan | 2017–2021 |
| 25 | MoU Between Ministry of Health and Ministry of Sports and Youth | 2016 |
| 26 | MoU Between Ministry of Health and the Department of Women’s Affairs | — |
| 27 | MoU Between Ministry of Health and Ministry of Roads and Urban Development (on NCD Control) | 2016 |
| 28 | MoU Between Health Deputy of Ministry of Health and Cooperative Department of Ministry of Labor | 2019 |
| 29 | MoU Between Ministry of Health and the Police Force of the Islamic Republic of Iran | 2018 |
| 30 | MoU Between Ministry of Health and Ministry of Foreign Affairs | 2018 |
| 31 | MoU Between Ministry of Health and Ministry of Agriculture Jihad | 2016 |
| 32 | Report on Identification and Management of Health Inequities Based on Disaggregated Variables | 2018 |
| 33 | First Report on Provincial Performance in Intersectoral Collaboration for Health and Food Security | 2015 |
| 34 | Supreme Council Resolution on the Health Promotion Plan for 8 Agricultural Products | 2017 |
| 35 | Supreme Council Resolution on Health Council Bylaws and Health System Reform Plan | 2003 |
| 36 | Supreme Council Resolution on Road Safety and Targeted Subsidies Program | 2004 |
| 37 | Supreme Council Resolution on Waste Management | 2005 |
| 38 | Supreme Council Resolution on Food Product Advertising Regulations | 2005 |
| 39 | Supreme Council Resolution on Safe Drinking Water Supply and Use of Wastewater for Irrigation | 2006 |
| 40 | Supreme Council Resolution on Pesticide and Heavy Metal Residue Control | 2008 |
| 41 | Supreme Council Resolution on Operational Plan for Social Determinants of Health Management | 2010 |
| 42 | Supreme Council Resolution on the Health Transformation Plan | 2012 |
| 43 | Supreme Council Resolution on Bread Safety, Health Resource Decentralization, Health Impact Assessment, and Nutrition Policy | 2013 |
| 44 | Supreme Council Resolution on Trans Fat Reduction, Agricultural Pollutant Control, and School Milk Program | 2014 |
| 45 | Supreme Council Resolution on Reducing NCD Burden | 2015 |
| 46 | Supreme Council Resolution on Neighborhood Health Hubs | 2017 |
| 47 | Supreme Council Resolution on Health Literacy Promotion Regarding Food Security and Nutrition | 2018 |
| 48 | Supreme Council Resolution on NCD Progress Report Submission to Secretariat | 2018 |
| 49 | Supreme Council Resolution on Organizational Reform to Consolidate Food and Nutrition Affairs | 2020 |
| 50 | Supreme Council Resolution on Health Equity Indicators | 2010 |
| 51 | Supreme Council Resolution on Executive Bylaw for Article 13 Amendment | 2012 |
| 52 | Supreme Council Resolution on Elderly Health Document, Nutrition Improvement with NGOs, and Socialization of Health | 2017 |
| 53 | Report on Trends, Opportunities, and Threats of Digital Health Technologies | 2021 |
| 54 | Report on Progress of Health Secretariats in Executive Organizations | 2021 |
| 55 | Report on Implementation Progress of NCD Control Decisions | 2019 |
| 56 | Report on Progress of the Agricultural Health Promotion Plan for 8 Products | 2021 |
| 57 | Report on Progress of Health Literacy and Food Security Promotion Programs in Partnership with Civil Institutions | 2021 |
| 58 | Report on Actions for Control and Monitoring of Oil Imports | 2020 |

**Interview Guide Form**

My name is Elham ShareghFarid, a PhD candidate in Food and Nutrition Policy at Tehran University of Medical Sciences. Under the supervision of Dr. Dorosty and Dr. Takian, I am conducting a research project titled:
**"Trends of the Dietary Inflammatory Index (DII) among Iranian Households at National and Sub-national Levels from 1991 to 2021; Its Association with Mortality from Cardiovascular Diseases, Cancer, Asthma, and Diabetes; and Policy Analysis for Household Dietary Interventions Based on Inflammatory Potential."**

This study is being conducted with the following three main objectives:

1. **To explore the key determinants that have influenced the dietary patterns of Iranian households over the past three decades,** including social, economic, cultural, and policy-related factors.
2. **To identify and evaluate past and current interventions and policies aimed at improving household diets,** and to propose evidence-informed policy actions needed for enhancing dietary quality in the future.
3. **To map and analyze the roles of key stakeholders involved in shaping, implementing, and influencing dietary policies and interventions** at national and sub-national levels.

To achieve these goals, it is necessary to collect insights from experts like you. I would like to request an interview with you to help enrich the study with your valuable perspective. Please note that the questions aim to explore your viewpoints, and there are no right or wrong answers.

**Warm-up Questions**

1. What is your role in .................................................................. ?
2. How long have you been working in this position?
3. On average, how many hours per day or per month do you spend on activities related to ................................................ ?

**Interview Questions**

1. Do you think the Dietary Inflammatory Index (DII) score obtained in this study using data from the Iranian Statistical Center aligns with your own experience and observations? Why or why not?
2. Has this index (DII) been used in previous years in Iran? If yes, why? If not, why not?
3. In your opinion, what are the main factors that motivate people to adopt an anti-inflammatory diet?
4. What dietary policies have been implemented in Iran so far to improve household diets?
   - Do you agree with the following list of policies?
   - Are there any interventions not mentioned in the list?
   - Which have been the most impactful?
   - What policies should have been implemented but were not?
5. What policies has your organization implemented in this area?
   - If some policies were not successful, what were the main barriers?
   - How has policy implementation varied across different provinces?
   - What solutions would you propose?
   - What were the intended goals of these policies?
6. Were the policies developed based on the experiences of other countries or documented guidelines?
   - Which models or frameworks were used in designing the policies?
7. What challenges or gaps (legal, cultural, social, or economic) exist in implementing current or future policies?
   - Are there any other contextual factors that have influenced policy adoption?
8. Has any evaluation of the implemented programs been carried out?
   - What were the measurable indicators of success or failure?
   - What were the evaluation results?
   - Have these results been used to improve future policies?
9. Are anti-inflammatory diets and the avoidance of pro-inflammatory foods a concern among the general public?
   - Has public awareness been sufficient in this area?
   - Do people have enough knowledge to make healthy dietary choices?
   - What capacity-building actions have been undertaken so far?
10. How were the policies implemented in practice?

- What factors facilitated better implementation?
- What were the main enablers?

1. Which population groups have benefited from these policies, and to what extent?

- Have any groups been adversely affected?
- Do you think these policies have impacted health inequalities and equity? If yes, how?

1. Has social media or digital platforms influenced the inflammatory potential of diets?

- Can you provide examples?
- What policies, if any, have been implemented to regulate or guide this influence?
- What are your suggestions for future action?

1. In your opinion, should there be international actions or collaborations to help reduce the inflammatory potential of diets? Should Iran change or expand its international engagement in this regard?

**Wrap-up Questions**

Thank you very much for your responses.
Is there anything else you would like to add or share?
Do you have any questions for me?

Thank you again, and I wish you a pleasant day.
